# Supplementary material
Source: PubMed Central journal article supplement (PMC4801029)
Supplement: NIHMS766325-supplement-Supplemental_tables.pdf [file NIHMS766325-supplement-Supplemental_tables.pdf]

| <b>Virus</b>                   | <b><math>\alpha 2,3</math> SL</b> | <b><math>\alpha 2,6</math> SL <math>K_d</math> [<math>\mu\text{g/ml}</math>]</b> |
|--------------------------------|-----------------------------------|----------------------------------------------------------------------------------|
| A/Perth/16/2009                | 91.4±12316                        | 0.008 ±0.018                                                                     |
| A/California/04/2009           | 1.0±1.8                           | 0.06977 ±.05                                                                     |
| A/harbor seal/NH/179629/2011   | 5.2±15.1                          | 0.063 ±0.09                                                                      |
| A/long-tailed duck/ME/295/2011 | 1.1±0.6                           | 0.37 ±0.61                                                                       |
| A/ruddy duck/IL/3471/2009      | 87.66±6472                        | 106 ±18147                                                                       |
| A/mallard/Alberta/551/2009     | 0.23±0.05                         | 55.41 ±6478                                                                      |
| A/mallard/Alberta/50/1979      | 0.33±0.07                         | 24 ±1647                                                                         |
| A/mallard/Alberta/274/1979     | 1.1±0.5                           | 93.7 ±11939                                                                      |
| A/duck/Ukraine/1/1963          | 0.51±0.07                         | 16.7±78.7                                                                        |

Supplementary Table 1: Dissociation constants ( $K_d$ ) [ $\mu\text{g/ml}$ ] ± standard deviation for H3N8 and human seasonal influenza viruses on absorbance from binding assays

| <b>Virus</b>                   | <b>Subtype</b> | <b>Antisera</b>                         |                                         |                                     |
|--------------------------------|----------------|-----------------------------------------|-----------------------------------------|-------------------------------------|
|                                |                | $\alpha$ Harbor Seal<br>(Ferret # 1131) | $\alpha$ Harbor Seal<br>(Ferret # 1132) | $\alpha$ pH1N1<br>(Ferret # ARC349) |
| A/California/04/2009           | pH1N1          | -                                       | -                                       | 640                                 |
| A/Perth/16/2009                | H3N2           | -                                       | -                                       | -                                   |
| A/harbor seal/NH/179629/2011   | H3N8           | 240                                     | 320                                     | -                                   |
| A/ruddy duck/IL/3471/2009      | H3N8           | 80                                      | 120                                     | -                                   |
| A/long-tailed duck/ME/295/2011 | H3N8           | 80                                      | 80                                      | -                                   |
| A/mallard/Alberta/551/2009     | H3N8           | 40                                      | 40                                      | -                                   |
| A/mallard/Alberta/50/1979      | H3N8           | 40                                      | 40                                      | -                                   |
| A/mallard/Alberta/274/1979     | H3N8           | 40                                      | 40                                      | -                                   |

Supplementary Table 2: Cross reaction of seal antisera against H3N8 and human seasonal influenza viruses

| Subtype          | Strains                                                | Compared to other subtypes? | Sialic Acid Linkage              | Replication <i>in vitro</i> | Replication in mice | Replication in ferrets | Transmission in ferrets            | Reference |
|------------------|--------------------------------------------------------|-----------------------------|----------------------------------|-----------------------------|---------------------|------------------------|------------------------------------|-----------|
| <b>H7</b>        | H7N7<br>H7N3<br>H7N2                                   | No                          | ND                               | ND                          | Yes                 | ND                     | ND                                 | 1         |
| <b>H1 and H6</b> | H1N9<br>H6N1                                           | Yes to each other           | $\alpha$ 2-3                     | ND                          | ND                  | Yes                    | Direct contact with H1N9 only      | 2         |
| <b>H7</b>        | H7N3<br>(5 viruses)                                    | No                          | ND<br>assume<br>$\alpha$ 2-3     | ND                          | Yes                 | Yes                    | ND                                 | 3         |
| <b>H7</b>        | H7N7<br>H7N3<br>H7N2                                   | No                          | $\alpha$ 2-3 and<br>$\alpha$ 2-6 | ND                          | ND                  | Yes                    | Direct contact with a few viruses  | 4         |
| <b>H9</b>        | reassortant virus H9N2<br>HA/NA on human H3N2 backbone | No                          | GOF towards<br>$\alpha$ 2-6      | ND                          | ND                  | Yes                    | respiratory droplet with mutations | 5         |
| <b>H6</b>        | H6N1<br>H6N2<br>H6N5<br>H6N8                           | No                          | $\alpha$ 2-3 and<br>$\alpha$ 2-6 | ND                          | Yes                 | Yes                    | Direct contact in 1 of 2 H6N5      | 6         |
| <b>H1</b>        | pdmH1N1 (4 viruses)                                    | No                          | $\alpha$ 2-6                     | ND                          | Yes                 | Yes                    | Yes respiratory                    | 7         |
| <b>H1</b>        | H1N1 (31 viruses)                                      | No                          | ND<br>assume<br>$\alpha$ 2-3     | ND                          | Yes                 | Yes                    | Direct with 1 virus                | 8         |
| <b>Mixed</b>     | H2, H3, H4,<br>H6, H7, H11                             | Yes                         | ND                               | Yes                         | Yes                 | ND                     | ND                                 | 9         |
| <b>H2</b>        | H2N2 (23 viruses)                                      | No                          | $\alpha$ 2-3                     | Yes                         | Yes                 | Yes                    | Direct with 3 viruses              | 10        |
| <b>H3</b>        | H3N2<br>H3N3<br>H3N8                                   | No                          | $\alpha$ 2-3 and<br>$\alpha$ 2-6 | ND                          | Yes                 | Yes                    | ND                                 | 11        |

|           |                                                        |    |                                         |     |     |     |                                                         |    |
|-----------|--------------------------------------------------------|----|-----------------------------------------|-----|-----|-----|---------------------------------------------------------|----|
| <b>H9</b> | H9N2 (10 viruses)<br>H3N2 used as transmission control | No | $\alpha$ 2-3 and $\alpha$ 2-6           | ND  | ND  | Yes | Direct with 2 of 5 viruses                              | 12 |
| <b>H4</b> | H4N6 (5 viruses)                                       | No | ND assume $\alpha$ 2-3                  | ND  | Yes | ND  | ND                                                      | 13 |
| <b>H5</b> | H5N1<br>H3N2 control reassortant                       | No | ND                                      | ND  | ND  | Yes | No H5N1                                                 | 14 |
| <b>H9</b> | H9N2 (12 viruses)                                      | No | ND assume $\alpha$ 2-3 and $\alpha$ 2-6 | Yes | Yes | Yes | Direct with 4 of 12 viruses                             | 15 |
| <b>H5</b> | H5N1 (4 viruses)                                       | No | ND assume $\alpha$ 2-3                  | ND  | Yes | Yes | No transmission                                         | 16 |
| <b>H5</b> | Pathogenicity studies limited to H5N1 (2 viruses)      | No | ND                                      | ND  | Yes | Yes | No transmission                                         | 17 |
| <b>H5</b> | H5N1 (11 viruses)                                      | No | ND                                      | ND  | Yes | Yes | No transmission                                         | 18 |
| <b>H6</b> | H6N1<br>H6N2<br>H6N5<br>H6N8<br>H6N9                   | No | ND                                      | ND  | Yes | Yes | ND                                                      | 19 |
| <b>H5</b> | H5N2 (2 viruses)                                       | No | ND assume $\alpha$ 2-3                  | Yes | Yes | ND  | ND                                                      | 20 |
| <b>H7</b> | H7N9 (3 viruses)<br>H1N1 used as positive control      | No | Yes                                     | Yes | Yes | Yes | Respiratory transmission in 1 of 3 animals with 1 virus | 21 |

Supplementary Table 3: Avian influenza viruses assessed for mammalian pathogenicity and transmission

Supplementary Table References:

- 1 Belser, J. A. *et al.* Pathogenesis of Avian Influenza (H7) Virus Infection in Mice and Ferrets: Enhanced Virulence of Eurasian H7N7 Viruses Isolated from Humans. *Journal of Virology* **81**, 11139-11147, doi:10.1128/jvi.01235-07 (2007).
- 2 Driskell, E. A. *et al.* Low Pathogenic Avian Influenza Isolates from Wild Birds Replicate and Transmit via Contact in Ferrets without Prior Adaptation. *PLoS ONE* **7**, e38067, doi:10.1371/journal.pone.0038067 (2012).
- 3 Aamir, U. B. *et al.* Zoonotic potential of highly pathogenic avian H7N3 influenza viruses from Pakistan. *Virology* **390**, 212-220, doi:<http://dx.doi.org/10.1016/j.virol.2009.05.008> (2009).
- 4 Belser, J. A. *et al.* Contemporary North American influenza H7 viruses possess human receptor specificity: Implications for virus transmissibility. *Proceedings of the National Academy of Sciences* **105**, 7558-7563, doi:10.1073/pnas.0801259105 (2008).
- 5 Sorrell, E. M., Wan, H., Araya, Y., Song, H. & Perez, D. R. Minimal molecular constraints for respiratory droplet transmission of an avian–human H9N2 influenza A virus. *Proceedings of the National Academy of Sciences* **106**, 7565-7570, doi:10.1073/pnas.0900877106 (2009).
- 6 Nam, J.-H. *et al.* Emergence of Mammalian Species-infectious and -pathogenic Avian Influenza H6N5 Virus with No Evidence of Adaptation. *Journal of Virology*, doi:10.1128/jvi.05038-11 (2011).
- 7 Maines, T. R. *et al.* Transmission and Pathogenesis of Swine-Origin 2009 A(H1N1) Influenza Viruses in Ferrets and Mice. *Science* **325**, 484-487, doi:10.1126/science.1177238 (2009).
- 8 Koçer, Z. A., Krauss, S., Stallknecht, D. E., Rehg, J. E. & Webster, R. G. The Potential of Avian H1N1 Influenza A Viruses to Replicate and Cause Disease in Mammalian Models. *PLoS ONE* **7**, e41609, doi:10.1371/journal.pone.0041609 (2012).
- 9 Driskell, E. A., Jones, C. A., Stallknecht, D. E., Howerth, E. W. & Tompkins, S. M. Avian influenza virus isolates from wild birds replicate and cause disease in a mouse model of infection. *Virology* **399**, 280-289, doi:<http://dx.doi.org/10.1016/j.virol.2010.01.005> (2010).
- 10 Jones, J. C. *et al.* Risk Assessment of H2N2 Influenza Viruses from the Avian Reservoir. *Journal of Virology*, doi:10.1128/jvi.02526-13 (2013).
- 11 Baz, M. *et al.* Replication and Immunogenicity of Swine, Equine, and Avian H3 Subtype Influenza Viruses in Mice and Ferrets. *Journal of Virology* **87**, 6901-6910, doi:10.1128/jvi.03520-12 (2013).
- 12 Wan, H. *et al.* Replication and Transmission of H9N2 Influenza Viruses in Ferrets: Evaluation of Pandemic Potential. *PLoS ONE* **3**, e2923, doi:10.1371/journal.pone.0002923 (2008).
- 13 Kang, H.-M. *et al.* Genetic and antigenic characteristics of H4 subtype avian influenza viruses in Korea and their pathogenicity in quails, domestic ducks and mice. *Journal of General Virology* **94**, 30-39, doi:10.1099/vir.0.046581-0 (2013).
- 14 Maines, T. R. *et al.* Lack of transmission of H5N1 avian–human reassortant influenza viruses in a ferret model. *Proceedings of the National Academy of Sciences* **103**, 12121-12126, doi:10.1073/pnas.0605134103 (2006).
- 15 SJCEIRS Working Group. Assessing the fitness of distinct clades of influenza A (H9N2) viruses. *Emerg Microbes Infect* **2**, e75, doi:10.1038/emi.2013.75 (2013).
- 16 Kwon, H.-i. *et al.* Genetic characterization and pathogenicity assessment of highly pathogenic H5N1 avian influenza viruses isolated from migratory wild birds in 2011, South Korea. *Virus Research* **160**, 305-315, doi:<http://dx.doi.org/10.1016/j.virusres.2011.07.003> (2011).

- 17 Nguyen, D. C. *et al.* Isolation and Characterization of Avian Influenza Viruses, Including Highly Pathogenic H5N1, from Poultry in Live Bird Markets in Hanoi, Vietnam, in 2001. *Journal of Virology* **79**, 4201-4212, doi:10.1128/jvi.79.7.4201-4212.2005 (2005).
- 18 Maines, T. R. *et al.* Avian Influenza (H5N1) Viruses Isolated from Humans in Asia in 2004 Exhibit Increased Virulence in Mammals. *Journal of Virology* **79**, 11788-11800, doi:10.1128/jvi.79.18.11788-11800.2005 (2005).
- 19 Gillim-Ross, L. *et al.* Avian Influenza H6 Viruses Productively Infect and Cause Illness in Mice and Ferrets. *Journal of Virology* **82**, 10854-10863, doi:10.1128/jvi.01206-08 (2008).
- 20 Karlsson, E. A. *et al.* Prevalence and characterization of influenza viruses in diverse species in Los Llanos, Colombia. *Emerg Microbes Infect* **2**, e20, doi:10.1038/emi.2013.20 (2013).
- 21 Watanabe, T. *et al.* Characterization of H7N9 influenza A viruses isolated from humans. *Nature* **501**, 551-555, doi:10.1038/nature12392 <http://www.nature.com/nature/journal/v501/n7468/abs/nature12392.html> - supplementary-information (2013).
